# Supplementary material
Source: Springer Nature journal article supplement (https://www.springermedizin.de/resource/supplementary/12885_2014_5055_MOESM2_ESM.pdf/9468260)
Supplement: MOESM2 [file 9468260]

**Additional Table 2 Main effect variables in propensity score models stratified by ypTNM stage**

|                                                                                                                               | ypStage I                                          | ypStage II                                                                                                                                                            | ypStage III                                                  |
|-------------------------------------------------------------------------------------------------------------------------------|----------------------------------------------------|-----------------------------------------------------------------------------------------------------------------------------------------------------------------------|--------------------------------------------------------------|
| Variables that significantly related to the patients' probability of receiving 5-FU compared with No-chemo                    | age at diagnosis, HCC score                        | pT category, age at diagnosis, sex, years of diagnosis, residence location                                                                                            | age at diagnosis, intestinal obstruction, years of diagnosis |
| Variables that significantly related to the patients' probability of receiving 5-FU plus oxaliplatin compared with 5-FU alone | years of diagnosis, number of lymph nodes examined | age at diagnosis, years of diagnosis, number of lymph nodes examined, median household income, intestinal obstruction, postoperative radiotherapy, residence location | age at diagnosis, years of diagnosis                         |

**Abbreviation:** No-chemo, without postoperative chemotherapy; 5-FU: 5-fluorouracil; HCC, Hierarchical Condition Categories.
